# Supplementary material for: Pharmacologic Interventions in Preventing Ovarian Hyperstimulation Syndrome: A Systematic Review and Network Meta-Analysis
Source: PubMed Central journal article supplement (PMC4707491; doi:10.1038/srep19093), 2016-01-11
Supplement: srep19093-s1.pdf [file srep19093-s1.pdf]

# **Pharmacologic Interventions in Preventing Ovarian Hyperstimulation Syndrome: A Systematic Review and Network Meta-Analysis**

Jun-Liang Guo<sup>1,2,#</sup>, Duo-Duo Zhang<sup>1,2,#</sup>, Yue Zhao<sup>2,#</sup>, Dan Zhang<sup>1</sup>,  
Xi-Meng Zhang<sup>2</sup>, Can-Quan Zhou<sup>1,\*</sup>, Shu-Zhong Yao<sup>1,\*</sup>

1 Department of Obstetrics & Gynaecology, The First Affiliated Hospital of Sun Yat-sen University, Guangzhou City, 510080, P.R. China

2 Zhong-shan School of Medicine, Sun Yat-sen University, Guangzhou City, 510082, P.R. China

\* Corresponding Author A: Shu-Zhong Yao, M.D., Chief Professor of the Department of Obstetrics & Gynaecology, The First Affiliated Hospital of Sun Yat-sen University, Guangzhou City, 510080. yszsysu@163.com. Corresponding Author B: Can-Quan Zhou, M.D., Chief Professor of the Centre of Reproductive Medicine, The First Affiliated Hospital of Sun Yat-sen University, Guangzhou City, 510080; zhoucanquan@hotmail.com.

# These authors contributed equally to this work.

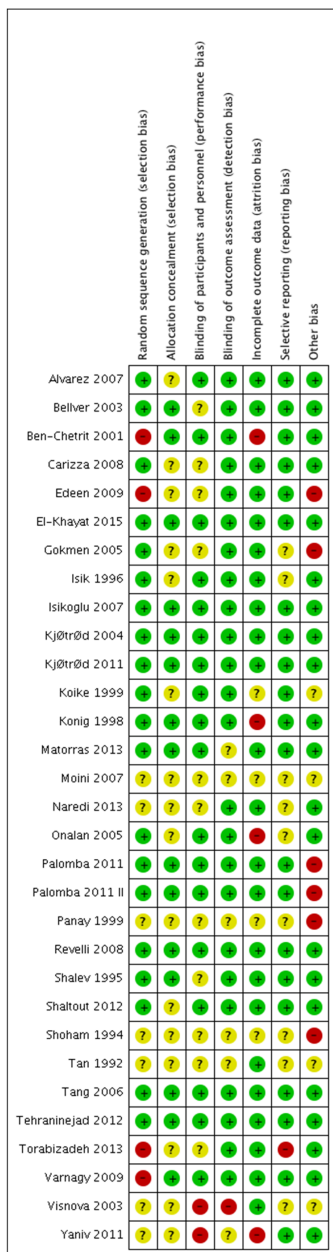

1

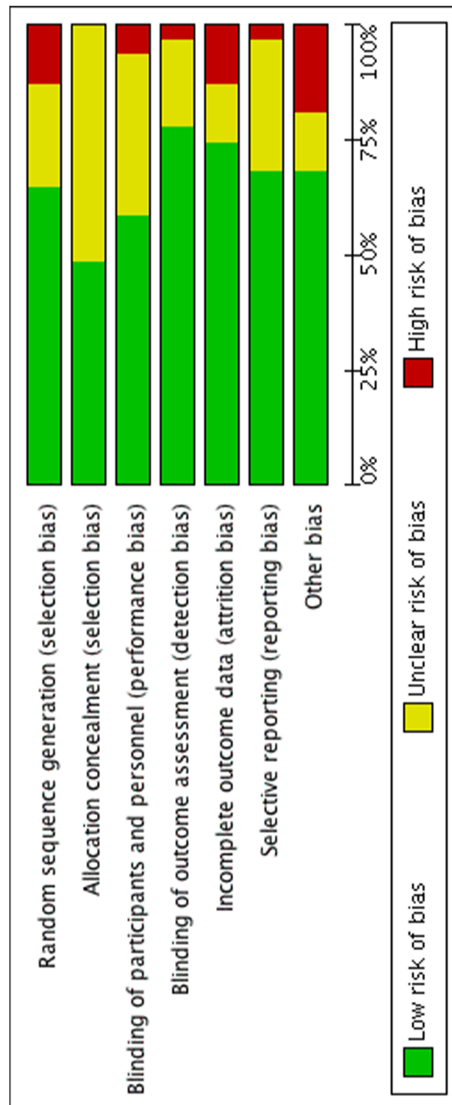

2

**Supplementary Figure A.**

1. Risk of bias summary figure of included studies. 2. Risk of bias figure of included studies.

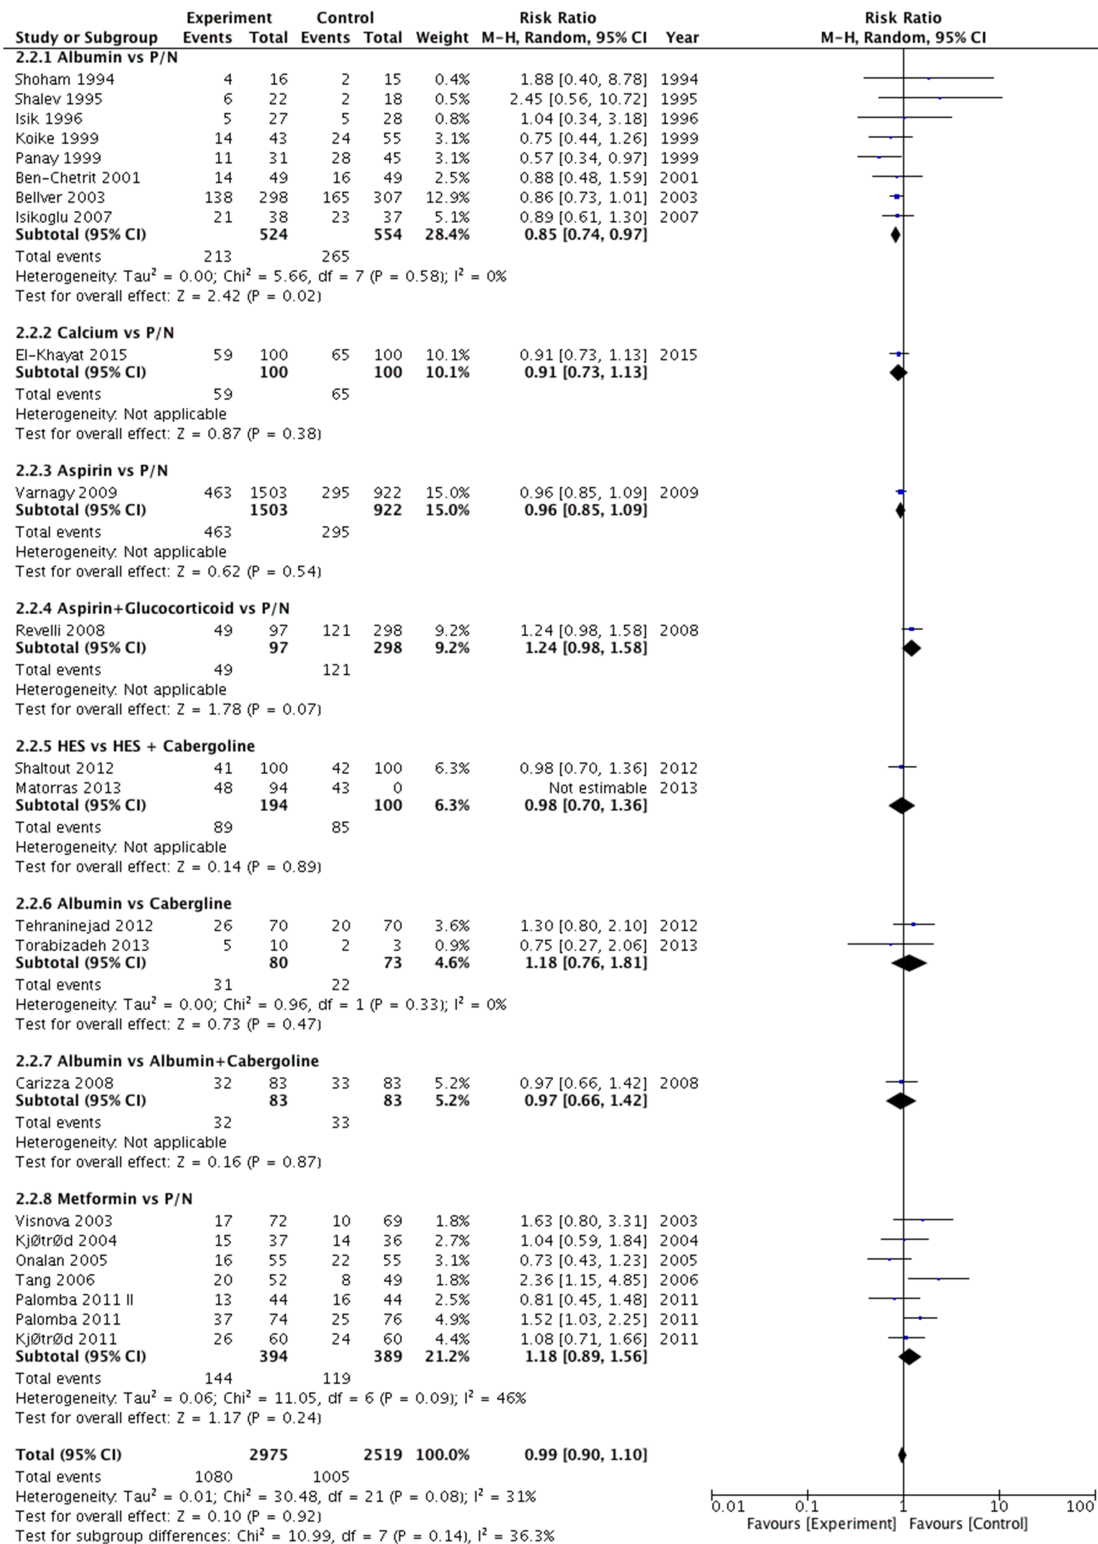

### Supplementary Figure B.

Forest plot of the direct pair-wise head-to-head comparisons between interventions and their comparators for the secondary outcome (pregnancy rate). “Experiment” in the plot represents the intervention, and “control” represents the comparator.

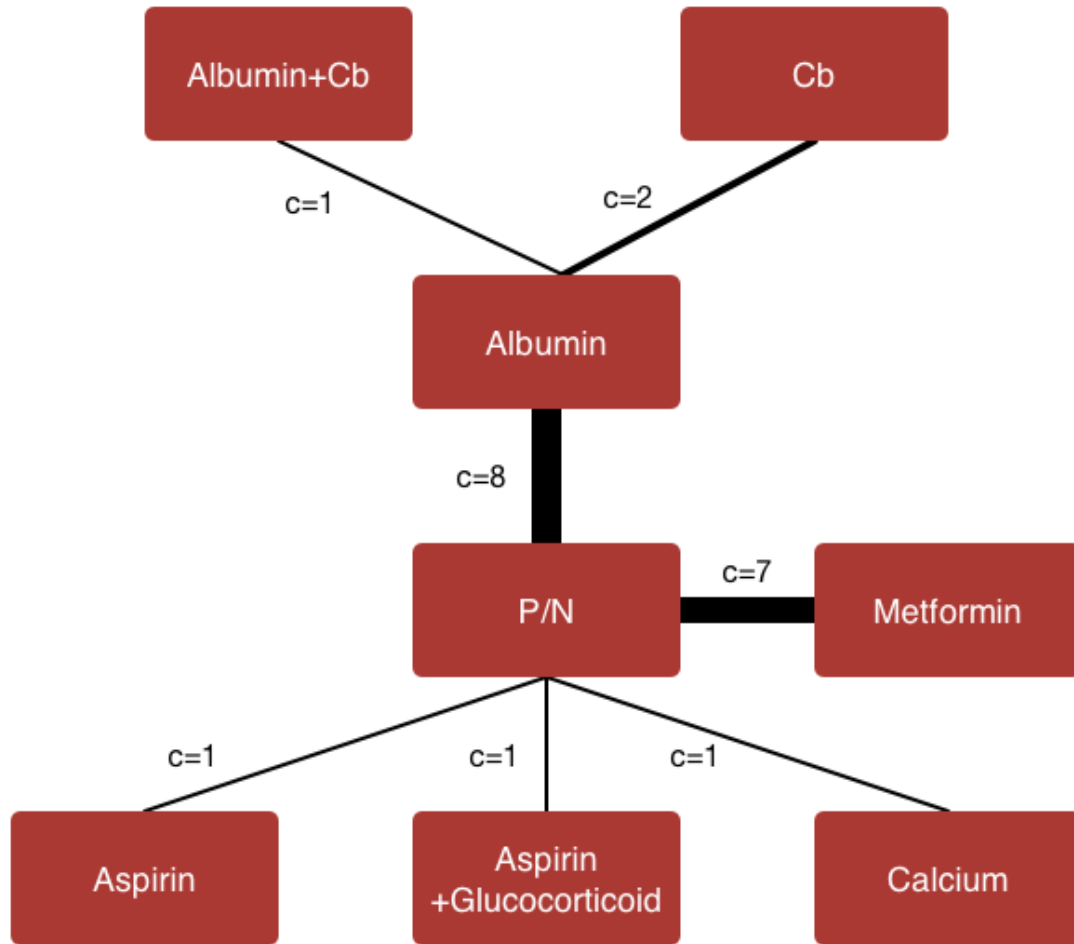

**Supplementary Figure C. Network figure of evidence in the indirect treatment comparison for the secondary outcome (pregnancy rate).** Each red rectangle represents a pharmacological intervention. “c=n” and the thickness of black columns represent the clinical trial number between each comparator.  
**Note:** Cb=cabergoline; P/N=placebo or no treatment.

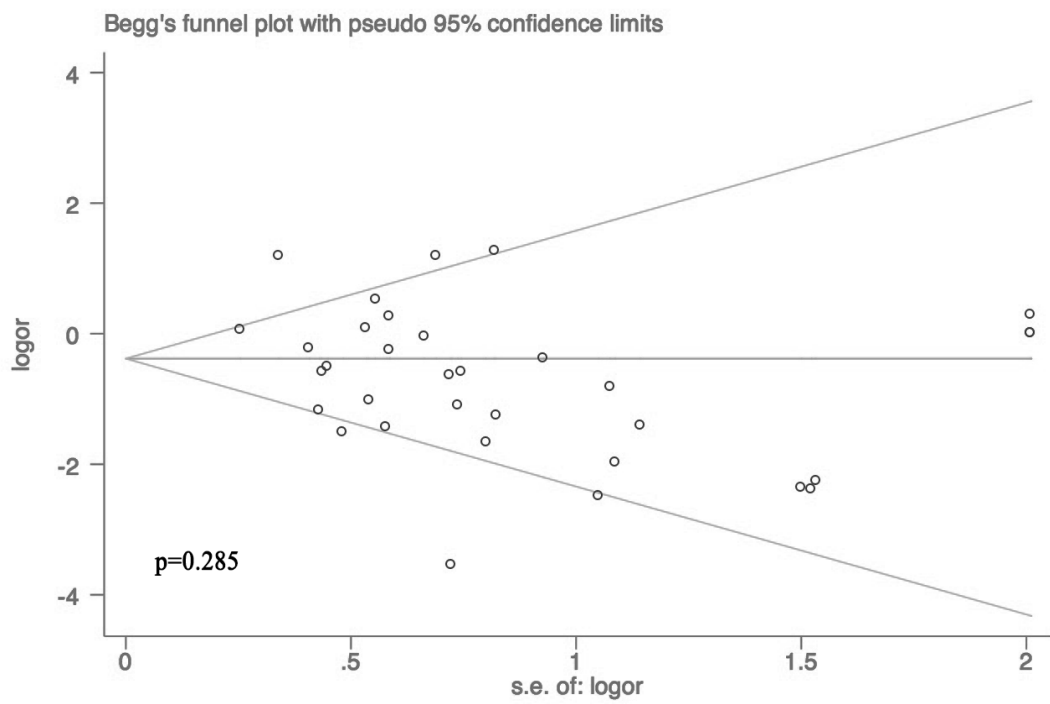

**Supplementary Figure D.**

Begg's funnel plot and Begg's regression test  $p$  value of included studies.

| Study                 | Intervention<br>Comparator | OHSS incidence |                         |               |                    |                       | Pregnancy rate |                    |                       |
|-----------------------|----------------------------|----------------|-------------------------|---------------|--------------------|-----------------------|----------------|--------------------|-----------------------|
|                       |                            | Mild<br>OHSS   | Moderate-Severe<br>OHSS | Total<br>OHSS | ITT<br>Participant | Actual<br>Participant | Pregnancy      | ITT<br>Participant | Actual<br>Participant |
| Tan<br>1992           | Glucocorticoid             | NR             | NR                      | 7             | 17                 | 17                    | NR             | NR                 | NR                    |
|                       | P/N                        | NR             | NR                      | 6             | 14                 | 14                    | NR             | NR                 | NR                    |
| Shoham<br>1994 *      | ALB                        | 0              | 0                       | 0             | NR                 | 16                    | 4              | NR                 | 16                    |
|                       | P/N                        | 0              | 4                       | 4             | NR                 | 15                    | 2              | NR                 | 15                    |
| Shalev<br>1995 *      | ALB                        | 0              | 0                       | 0             | 22                 | 22                    | 6              | 22                 | 19                    |
|                       | P/N                        | 0              | 4                       | 4             | 18                 | 18                    | 2              | 18                 | 17                    |
| Isik<br>1996 *        | ALB                        | 0              | 0                       | 0             | 27                 | 27                    | 5              | 27                 | 27                    |
|                       | P/N                        | 0              | 5                       | 5             | 28                 | 28                    | 5              | 28                 | 28                    |
| Konig<br>1998         | HES                        | NR             | 1                       | 1             | 53                 | 51                    | NR             | NR                 | NR                    |
|                       | P/N                        | NR             | 7                       | 7             | 51                 | 50                    | NR             | NR                 | NR                    |
| Koike<br>1999 *       | ALB                        | NR             | 13                      | 13            | 43                 | 43                    | 14             | 43                 | 43                    |
|                       | P/N                        | NR             | 21                      | 21            | 55                 | 55                    | 24             | 55                 | 55                    |
| Panay<br>1999 *       | ALB                        | NR             | NR                      | 0             | NR                 | 37                    | 11             | NR                 | 31                    |
|                       | P/N                        | NR             | NR                      | 0             | NR                 | 49                    | 28             | NR                 | 45                    |
| Ben-Chetrit<br>2001 * | ALB                        | 36             | 10                      | 46            | 49                 | 46                    | 14             | 49                 | 46                    |
|                       | P/N                        | 35             | 6                       | 41            | 49                 | 41                    | 16             | 49                 | 41                    |
| Visnova<br>2003 *     | Metformin                  | NR             | NR                      | 6             | 72                 | 72                    | 17             | 72                 | 72                    |
|                       | P/N                        | NR             | NR                      | 26            | 69                 | 69                    | 10             | 69                 | 69                    |
| Bellver<br>2003 *     | ALB                        | NR             | 34                      | 34            | 495                | 488                   | 138            | 298                | NR                    |
|                       | P/N                        | NR             | 32                      | 32            | 493                | 488                   | 165            | 307                | NR                    |
| Kjøtrød               | Metformin                  | NR             | NR                      | 1             | 37                 | 31                    | 15             | 37                 | 31                    |

|                    |                            |    |    |    |      |      |     |      |      |
|--------------------|----------------------------|----|----|----|------|------|-----|------|------|
| 2004 *             | P/N                        | NR | NR | 4  | 36   | 32   | 14  | 36   | 32   |
| Gokmen<br>2005 *   | HES                        | NR | 8  | 8  | 112  | 112  | NR  | NR   | NR   |
|                    | ALB                        | NR | 7  | 7  | 105  | 105  | NR  | NR   | NR   |
|                    | P/N                        | NR | 24 | 24 | 103  | 103  | NR  | NR   | NR   |
| Onalan<br>2005 *   | Metformin                  | 3  | 0  | 3  | 55   | 53   | 16  | 55   | 53   |
|                    | P/N                        | 4  | 0  | 4  | 55   | 55   | 22  | 55   | 55   |
| Tang<br>2006 *     | Metformin                  | NR | 2  | 2  | 52   | 47   | 20  | 52   | 47   |
|                    | P/N                        | NR | 10 | 10 | 49   | 47   | 8   | 49   | 47   |
| Alvarez<br>2007    | Cabergoline                | NR | 11 | 11 | 41   | 35   | NR  | NR   | NR   |
|                    | P/N                        | NR | 20 | 20 | 41   | 32   | NR  | NR   | NR   |
| Isikoglu<br>2007 * | ALB                        | NR | 8  | 8  | 38   | 38   | 21  | 38   | 38   |
|                    | P/N                        | NR | 6  | 6  | 37   | 37   | 23  | 37   | 37   |
| Moini<br>2007      | Aspirin                    | NR | NR | 4  | 72   | 72   | NR  | NR   | NR   |
|                    | P/N                        | NR | NR | 17 | 73   | 73   | NR  | NR   | NR   |
| Carizza<br>2008 *  | Cabergoline<br>+ALB        | NR | NR | 9  | 83   | 83   | 33  | 83   | 83   |
|                    | ALB                        | NR | NR | 15 | 83   | 80   | 32  | 83   | 80   |
| Revelli<br>2008 *  | Aspirin+<br>Glucocorticoid | NR | 1  | 1  | 97   | 97   | 49  | 97   | 97   |
|                    | P/N                        | NR | 7  | 7  | 298  | 298  | 121 | 298  | 298  |
| Varnagy<br>2009 *  | Aspirin                    | NR | 2  | 2  | 1503 | 1503 | 463 | 1503 | 1503 |
|                    | P/N                        | NR | 43 | 43 | 922  | 922  | 295 | 922  | 922  |
| Edeen<br>2009      | Glucocorticoid             | NR | NR | 7  | 75   | 75   | NR  | NR   | NR   |
|                    | Cabergoline                | NR | NR | 2  | 75   | 75   | NR  | NR   | NR   |

|                        |                     |    |    |    |     |     |    |     |     |
|------------------------|---------------------|----|----|----|-----|-----|----|-----|-----|
|                        | P/N                 | NR | NR | 6  | 50  | 50  | NR | NR  | NR  |
| Yaniv<br>2011          | Cabergoline         | NR | 3  | 3  | 20  | 18  | NR | NR  | NR  |
|                        | P/N                 | NR | 9  | 9  | 20  | 19  | NR | NR  | NR  |
| Palomba<br>2011 *      | Metformin           | 0  | 0  | 0  | 44  | 44  | 13 | 44  | 44  |
|                        | P/N                 | 2  | 0  | 2  | 44  | 44  | 16 | 44  | 44  |
| Palomba<br>2011 II *   | Metformin           | 3  | 2  | 5  | 60  | 60  | 26 | 60  | 60  |
|                        | P/N                 | 11 | 7  | 18 | 60  | 60  | 24 | 60  | 60  |
| Kjøtrød<br>2011 *      | Metformin           | NR | 2  | 5  | 74  | 74  | 37 | 74  | 74  |
|                        | P/N                 | NR | 3  | 5  | 76  | 75  | 25 | 76  | 75  |
| Shaltout<br>2012 *     | Cabergoline<br>+HES | 5  | 5  | 10 | 100 | 100 | 42 | 100 | 100 |
|                        | HES                 | 7  | 14 | 21 | 100 | 100 | 41 | 100 | 100 |
| Tehraninejad<br>2012 * | ALB                 | NR | 49 | 49 | 70  | 69  | 26 | 70  | 69  |
|                        | Cabergoline         | NR | 15 | 15 | 70  | 69  | 20 | 70  | 69  |
| Torabizadeh<br>2013 *  | ALB                 | NR | 10 | 10 | 48  | 48  | 5  | 10  | 10  |
|                        | Cabergoline         | NR | 3  | 3  | 47  | 47  | 2  | 3   | 3   |
| Naredi<br>2013         | Calcium             | 6  | 3  | 9  | 98  | 98  | NR | NR  | NR  |
|                        | Cabergoline         | 10 | 6  | 16 | 104 | 104 | NR | NR  | NR  |
| Matorras<br>2013 *     | HES                 |    | NR | 3  | 94  | 94  | 48 | 94  | 94  |
|                        | Cabergoline<br>+HES |    | NR | 5  | 88  | 88  | 43 | 88  | 88  |
|                        | P/N                 | NR | 1  | 1  | 33  | 33  | 19 | 33  | 33  |
| El-Khayat              | Calcium             | 6  | 1  | 7  | 100 | 100 | 59 | 100 | 100 |



|        |     |    |    |    |     |     |    |     |     |
|--------|-----|----|----|----|-----|-----|----|-----|-----|
| 2015 * | P/N | 11 | 12 | 23 | 100 | 100 | 65 | 100 | 100 |
|--------|-----|----|----|----|-----|-----|----|-----|-----|

**Supplementary Table A.** Summary of the extracted data of two outcomes from 31 studies.

**Note:** NR=not reported; P/N=placebo or no treatment.

\* Pregnancy rate (secondary outcome) available.

| Intervention     | Comparator     | Direct Effect |                | Indirect Effect |               | <i>p</i> value |
|------------------|----------------|---------------|----------------|-----------------|---------------|----------------|
|                  |                | LRR           | 95%CI          | LRR             | 95%CI         |                |
| Albumin          | Cabergoline    | -1.90         | (-3.30, -0.47) | -0.69           | (-2.01, 0.78) | 0.19           |
| Albumin          | HES infusion   | -0.17         | (-2.09, 1.95)  | -1.94           | (-5.69, 0.81) | 0.28           |
| Albumin          | P/N            | 0.71          | (-0.02, 1.69)  | 0.20            | (-1.44, 1.98) | 0.54           |
| Calcium infusion | Cabergoline    | 0.72          | (-1.50, 3.09)  | 1.07            | (-1.70, 4.71) | 0.84           |
| Calcium infusion | P/N            | 2.99          | (0.40, 6.62)   | 2.59            | (0.08, 5.19)  | 0.82           |
| Cabergoline      | Glucocorticoid | 1.49          | (-0.82, 3.88)  | 1.78            | (-0.68, 4.41) | 0.86           |
| Cabergoline      | P/N            | 1.41          | (0.22, 2.71)   | 2.33            | 1.06, 3.76)   | 0.27           |

**Supplementary Table B.** Results of the node-splitting analysis for the assessment of inconsistencies. The analysis compares the direct effect with the indirect effect between interventions to estimate inconsistencies in the network analysis. *P* value>0.05 represents no significant difference between the direct and indirect effect.

**Note:** LRR=log relative risk; CI=confidence interval; P/N=placebo or no treatment.

| Drug                   | Rank 1 | Rank 2 | Rank 3 | Rank 4 | Rank 5 | Rank 6 | Rank 7 | Rank 8 | Rank 9 | Rank 10 |
|------------------------|--------|--------|--------|--------|--------|--------|--------|--------|--------|---------|
| ALB                    | 0      | 0      | 0      | 0      | 1      | 5      | 13     | 29     | 36     | 14      |
| ALB+Cabergoline        | 4      | 6      | 7      | 9      | 10     | 12     | 15     | 15     | 9      | 6       |
| Aspirin                | 36     | 29     | 15     | 8      | 5      | 3      | 2      | 1      | 0      | 0       |
| Aspirin+Glucocorticoid | 12     | 8      | 7      | 6      | 8      | 8      | 9      | 10     | 9      | 8       |
| Calcium infusion       | 35     | 27     | 15     | 9      | 5      | 4      | 2      | 1      | 1      | 0       |
| Cabergoline            | 1      | 8      | 22     | 25     | 20     | 13     | 7      | 3      | 0      | 0       |
| Glucocorticoid         | 0      | 0      | 1      | 1      | 2      | 4      | 8      | 13     | 17     | 23      |
| HES                    | 1      | 3      | 7      | 12     | 16     | 20     | 20     | 13     | 6      | 2       |
| HES+Cabergoline        | 10     | 13     | 14     | 13     | 13     | 12     | 9      | 6      | 4      | 3       |
| Metformin              | 1      | 5      | 11     | 17     | 19     | 19     | 15     | 8      | 3      | 1       |
| P/N                    | 0      | 0      | 0      | 0      | 0      | 0      | 0      | 3      | 13     | 42      |

**Supplementary Table C.** Rank probability result for interventions of the network meta-analysis of the primary outcome (OHSS incidence). The smaller rank number represents the better estimated effect. Each number (expressed in per cent) in this table demonstrates an estimated probability of an intervention to occupy a specific rank.

**Note:** P/N=placebo or no treatment.

| <b>Intervention</b>        | <b>Comparator</b>          | <b>Relative Risk</b> | <b>95% CI</b> | <b>p value</b> |
|----------------------------|----------------------------|----------------------|---------------|----------------|
| Albumin+Cb                 | P/N                        | 0.78                 | [0.40,1.53]   | 0.473          |
| Cb                         | P/N                        | 0.54                 | [0.26,1.12]   | 0.099          |
| Albumin                    | Aspirin                    | 0.79                 | [0.58,1.07]   | 0.121          |
| Albumin                    | Aspirin<br>+Glucocorticoid | 0.50                 | [0.30,0.84]   | 0.009          |
| Albumin                    | Metformin                  | 0.56                 | [0.38,0.83]   | 0.004          |
| Albumin                    | Calcium infusion           | 0.96                 | [0.51,1.79]   | 0.897          |
| Aspirin                    | Aspirin<br>+Glucocorticoid | 0.63                 | [0.39,1.04]   | 0.07           |
| Aspirin                    | Calcium infusion           | 1.22                 | [0.67,2.22]   | 0.513          |
| Aspirin+<br>Glucocorticoid | Calcium infusion           | 1.93                 | [0.92,4.02]   | 0.08           |
| Metformin                  | Aspirin                    | 1.40                 | [0.99,1.99]   | 0.057          |
| Metformin                  | Aspirin<br>+Glucocorticoid | 0.89                 | [0.51,1.54]   | 0.678          |
| Metformin                  | Calcium infusion           | 1.72                 | [0.90,3.28]   | 0.102          |

**Supplementary Table D. Results of indirect treatment comparisons (ITCs) based on a generalised linear regression model for the secondary outcome (pregnancy rate).**

**Note:** Cb=cabergoline; CI=confidence interval; P/N=placebo or no treatment.
